# Supplementary material for: Study on rheological properties of composite propellant slurry in the mixing process by using experimental and numerical simulation
Source: Royal Society of Chemistry journal article supplement (doi:10.1039/d4ra05964f), 2024-01-01
Supplement: d4ra05964f1.pdf [file d4ra05964f1.pdf]

## Electronic Supplementary Information (ESI)

### **Study on rheological properties of composite propellant slurry in mixing process by using experimental and numerical simulation**

Zhiming Guo<sup>a,b</sup>, Xiaolong Fu<sup>c</sup>, Riccardo Rossi<sup>\*a</sup>

<sup>a</sup>*Departament d'Enginyeria Civil i Ambiental (DECA), Universitat Politècnica de Catalunya (UPC), Jordi Girona 1, Barcelona, 08034, Barcelona, Spain, E-mail address: [zhiming.guo@upc.edu](mailto:zhiming.guo@upc.edu), [riccardo.rossi@upc.edu](mailto:riccardo.rossi@upc.edu)*

<sup>b</sup>*School of Mechatronics Engineering, North University of China, Taiyuan 030051, PR China, E-mail address: [sedisim@nuc.edu.cn](mailto:sedisim@nuc.edu.cn)*

<sup>c</sup>*Xi'an Modern Chemistry Research Institute, Xi'an, 710065, China.*

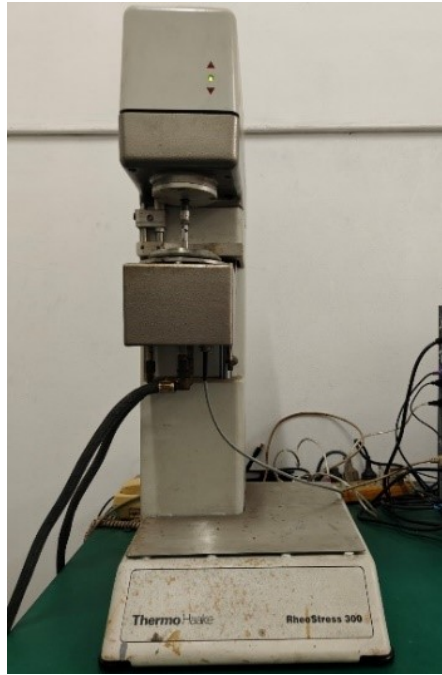

**Fig. S1** HAKKE RS300 rotational rheometer.

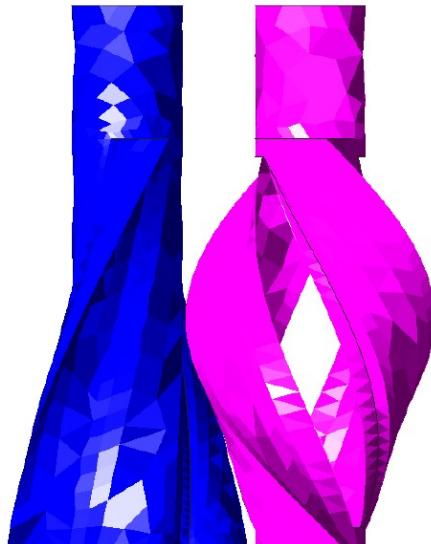

**Fig. S2** Lateral view of the mixer.
